# Supplementary material for: Reductive lithium insertion into B-cation deficient niobium perovskite oxides
Source: Royal Society of Chemistry journal article supplement (doi:10.1039/c4dt03193h), 2014-12-17
Supplement: c4dt03193h1.pdf [file c4dt03193h1.pdf]

## Supporting Information

### Reductive Lithium Insertion into B-cation deficient Niobium Perovskite Oxides

Antonio Perejon and Michael A. Hayward

| Cation | Anion | Bond length (Å) | BVS     |
|--------|-------|-----------------|---------|
| Ba(1)  | O(1)  | 2.959(4) × 3    | Ba+2.06 |
|        | O(1)  | 2.906(2) × 6    |         |
|        | O(2)  | 2.999(4) × 3    |         |
| Ba(2)  | O(1)  | 2.773(4) × 3    | Ba+2.42 |
|        | O(2)  | 2.905(1) × 6    |         |
|        | O(3)  | 2.970(3) × 3    |         |
| Ba(3)  | O(2)  | 2.849(3) × 6    | Ba+2.47 |
|        | O(3)  | 2.901(1) × 6    |         |
| Nb(1)  | O(1)  | 1.895(3) × 3    | Nb+4.72 |
|        | O(2)  | 2.145(3) × 3    |         |
| Nb(2)  | O(2)  | 2.011(9) × 3    | Nb+4.33 |
|        | O(3)  | 2.053(2) × 3    |         |
| Li(1)  | O(1)  | 2.177(2) × 6    | Li+0.87 |

Table S1: Selected bond lengths from the refined structure of Ba<sub>5</sub>LiNb<sub>4</sub>O<sub>15</sub>.

| Cation   | Anion | Bond length (Å) | BVS             |
|----------|-------|-----------------|-----------------|
| Ba(1)    | O(1)  | 2.825(11) × 3   | Ba+2.36         |
|          | O(2)  | 2.923(13) × 6   |                 |
|          | O(3)  | 2.900(5) × 3    |                 |
| Ba(2)    | O(2)  | 2.950(6) × 3    | Ba+2.05         |
|          | O(3)  | 2.910(18) × 6   |                 |
|          | O(3)  | 3.008(6) × 3    |                 |
| Ba(3)    | O(1)  | 2.828(22) × 3   | Ba+2.37         |
|          | O(1)  | 2.903(9) × 6    |                 |
|          | O(2)  | 2.932(6) × 3    |                 |
| Nb/Ti(1) | O(1)  | 1.966(13) × 3   | Nb+4.54/Ti+3.50 |
|          | O(2)  | 2.069(3) × 3    |                 |
| Nb/Ti(2) | O(2)  | 2.064(5) × 3    | Nb+4.41/Ti+3.40 |
|          | O(3)  | 1.989(26) × 3   |                 |
| Nb/Ti(3) | O(3)  | 2.108(24) × 6   | Nb+3.52/Ti+2.71 |
| Li(1)    | O(1)  | 2.115(13) × 6   | Li+1.03         |

Table S2: Selected bond lengths from the refined structure of Ba<sub>6</sub>LiTiNb<sub>5</sub>O<sub>18</sub>.

| Atom                                                                                                      | x      | y      | z         | Fraction        | U <sub>iso</sub> (Å <sup>2</sup> ) |
|-----------------------------------------------------------------------------------------------------------|--------|--------|-----------|-----------------|------------------------------------|
| Ba(1)                                                                                                     | 0      | 0      | 0.2418(4) | 1               | 0.041(2)                           |
| Ba(2)                                                                                                     | 1/3    | 2/3    | 0.4195(5) | 1               | 0.041(2)                           |
| Ba(3)                                                                                                     | 2/3    | 1/3    | 0.0783(6) | 1               | 0.041(2)                           |
| Nb/Ti(1)                                                                                                  | 1/3    | 2/3    | 0.1657(8) | 0.98(1)/0.02(1) | 0.022(1)                           |
| Nb/Ti(2)                                                                                                  | 2/3    | 1/3    | 0.3359(6) | 0.71(1)/0.29(1) | 0.022(1)                           |
| Nb/Ti(3)                                                                                                  | 0      | 0      | 0.5       | 0.71(1)/0.29(1) | 0.022(1)                           |
| Li(1)                                                                                                     | 0      | 0      | 0         | 1               | 0.022(1)                           |
| O(1)                                                                                                      | 0.734  | 0.3450 | 0.0854    | 1               | 0.093(1)                           |
| O(2)                                                                                                      | 0.4981 | 0.4927 | 0.2470    | 1               | 0.093(1)                           |
| O(3)                                                                                                      | 0.8321 | 0.1633 | 0.4089    | 1               | 0.093(1)                           |
| Ba <sub>6</sub> LiTiNb <sub>5</sub> O <sub>18</sub> – space group P-3 : a = 5.7782(1) Å, c = 14.2293(4) Å |        |        |           |                 |                                    |
| $\chi^2 = 1.323$ , wRp = 5.39%, Rp = 4.44%                                                                |        |        |           |                 |                                    |

Table S3: Structural parameters of Ba<sub>6</sub>LiTiNb<sub>5</sub>O<sub>18</sub> refined from X-ray powder diffraction data collected at 298K.

| Atom                                                                                                                                                                  | <i>x</i> | <i>y</i> | <i>z</i>  | Fraction            | $U_{\text{iso}} (\text{\AA}^2)$ |
|-----------------------------------------------------------------------------------------------------------------------------------------------------------------------|----------|----------|-----------|---------------------|---------------------------------|
| Ba/La(1)                                                                                                                                                              | 0        | 0        | 0.2838(2) | 0.61(2)/<br>0.39(2) | 0.082(3)                        |
| Ba/La(2)                                                                                                                                                              | 0        | 0        | 0.1336(1) | 0.89(2)/<br>0.11(2) | 0.082(3)                        |
| Nb/Li(1)                                                                                                                                                              | 0        | 0        | 0.4160(2) | 0.77(1)/<br>0.23(1) | 0.0043(3)                       |
| Nb/Li(2)                                                                                                                                                              | 0        | 0        | 0.5       | 0.46(2)/<br>0.54(2) | 0.0043(3)                       |
| Nb(3)                                                                                                                                                                 | 0        | 0        | 0         | 1                   | 0.0043(3)                       |
| O(1)                                                                                                                                                                  | 0.1690   | 0.8309   | 0.6283    | 1                   | 0.026(1)                        |
| O(2)                                                                                                                                                                  | 0.1639   | 0.8360   | 0.4529    | 1                   | 0.026(1)                        |
| Ba <sub>3</sub> LaLiNb <sub>3</sub> O <sub>12</sub> – space group <i>R-3m</i> : <i>a</i> = 5.7968(1) Å, <i>c</i> = 28.477(1) Å<br>Phase fraction: 88.2 weight percent |          |          |           |                     |                                 |
| Ba <sub>3</sub> LaNb <sub>3</sub> O <sub>12</sub> – space group <i>R-3m</i> : <i>a</i> = 5.765(1) Å, <i>c</i> = 28.161(4) Å<br>Phase fraction: 11.8 weight percent    |          |          |           |                     |                                 |
| $\chi^2 = 1.39$ , wRp = 2.04%, Rp = 1.93%                                                                                                                             |          |          |           |                     |                                 |

Table S4: Structural parameters of Ba<sub>3</sub>LaLiNb<sub>3</sub>O<sub>12</sub> refined from X-ray powder diffraction data collected at 298K. The positions of the oxide ions were not refined, but taken from the neutron diffraction refinement, as were the fractions of the two phases.

| Cation   | Anion | Bond length (Å) | BVS             |
|----------|-------|-----------------|-----------------|
| Ba/La(1) | O(1)  | 3.030(3) × 3    | Ba+2.77/La+2.01 |
|          | O(1)  | 2.915(3) × 6    |                 |
|          | O(2)  | 2.610(3) × 3    |                 |
| Ba/La(2) | O(1)  | 3.168(5) × 3    | Ba+2.02/La+1.47 |
|          | O(2)  | 2.924(2) × 6    |                 |
|          | O(2)  | 2.846(5) × 3    |                 |
| Nb/Li(1) | O(1)  | 2.121(4) × 3    | Nb+4.44/Li+1.33 |
|          | O(2)  | 1.944(2) × 3    |                 |
| Nb/Li(2) | O(2)  | 2.121(2) × 6    | Nb+3.40/Li+1.02 |
| Nb(3)    | O(1)  | 1.977(2) × 6    | Nb+5.01         |

Table S5: Selected bond lengths from the refined structure of Ba<sub>3</sub>LaLiNb<sub>3</sub>O<sub>12</sub>.

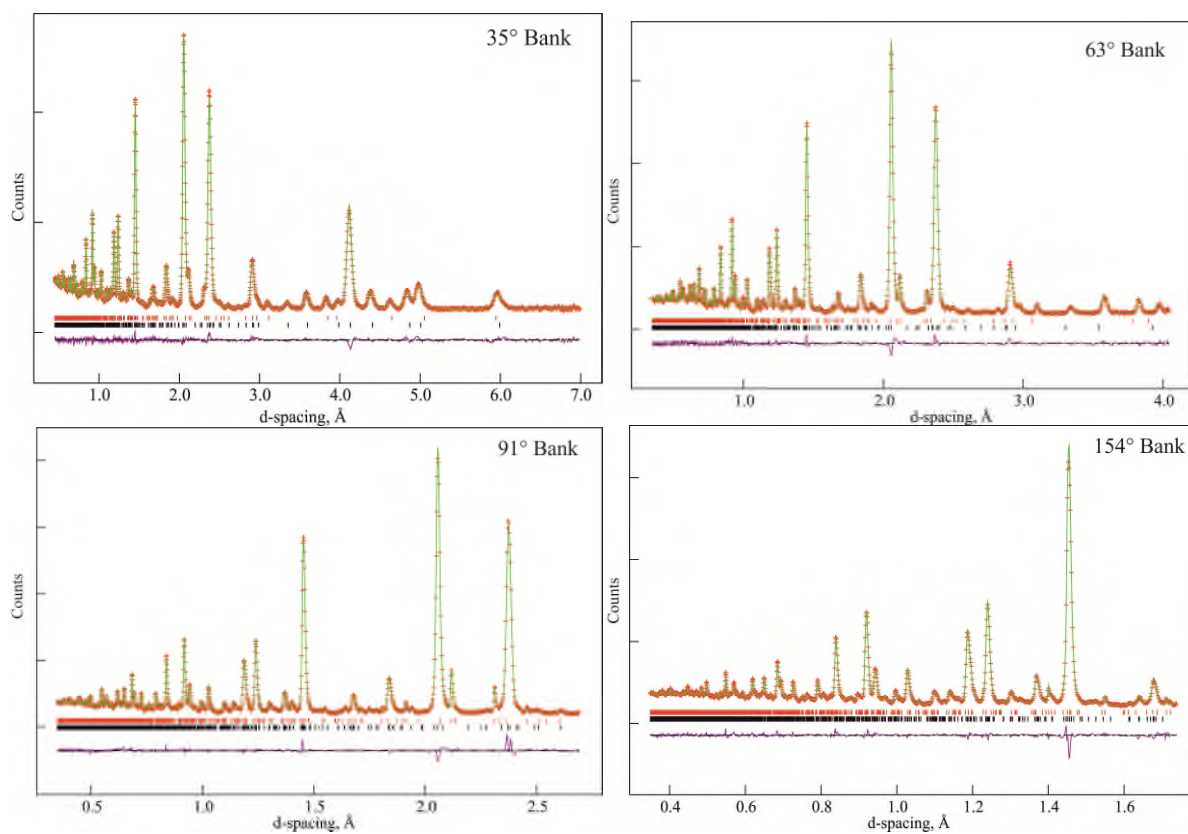

Figure S1: Observed, calculated and difference plots from the structural refinement of  $\text{Ba}_5\text{LiNb}_4\text{O}_{15}$  against neutron powder diffraction data. Lower tick marks indicate peak positions for the majority phase, upper tick marks for the secondary phase  $\text{Ba}_5\text{Nb}_4\text{O}_{15}$ .

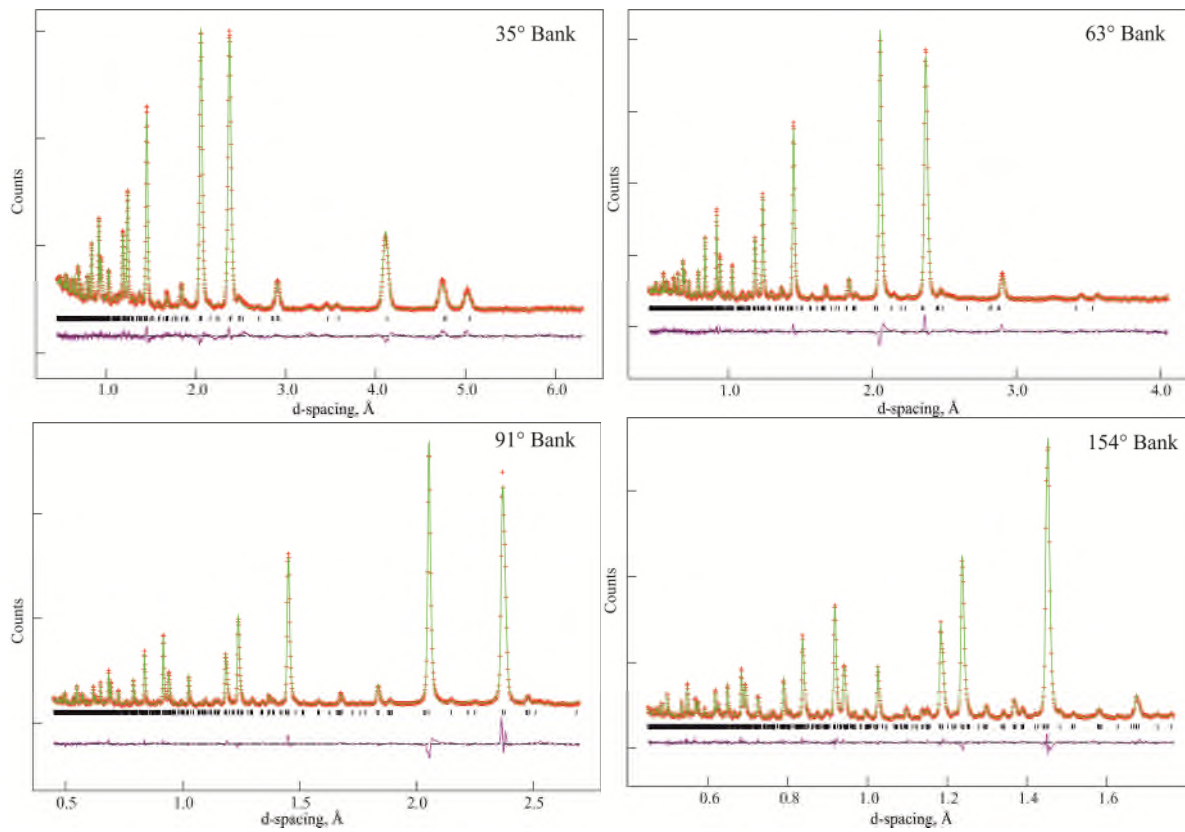

Figure S2: Observed, calculated and difference plots from the structural refinement of  $\text{Ba}_6\text{LiTiNb}_4\text{O}_{18}$  against neutron powder diffraction data.

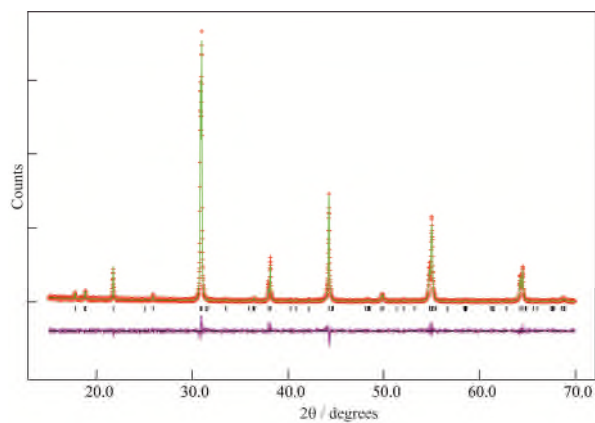

Figure S3: Observed, calculated and difference plots from the structural refinement of  $\text{Ba}_6\text{LiTiNb}_4\text{O}_{18}$  against X-ray powder diffraction data.

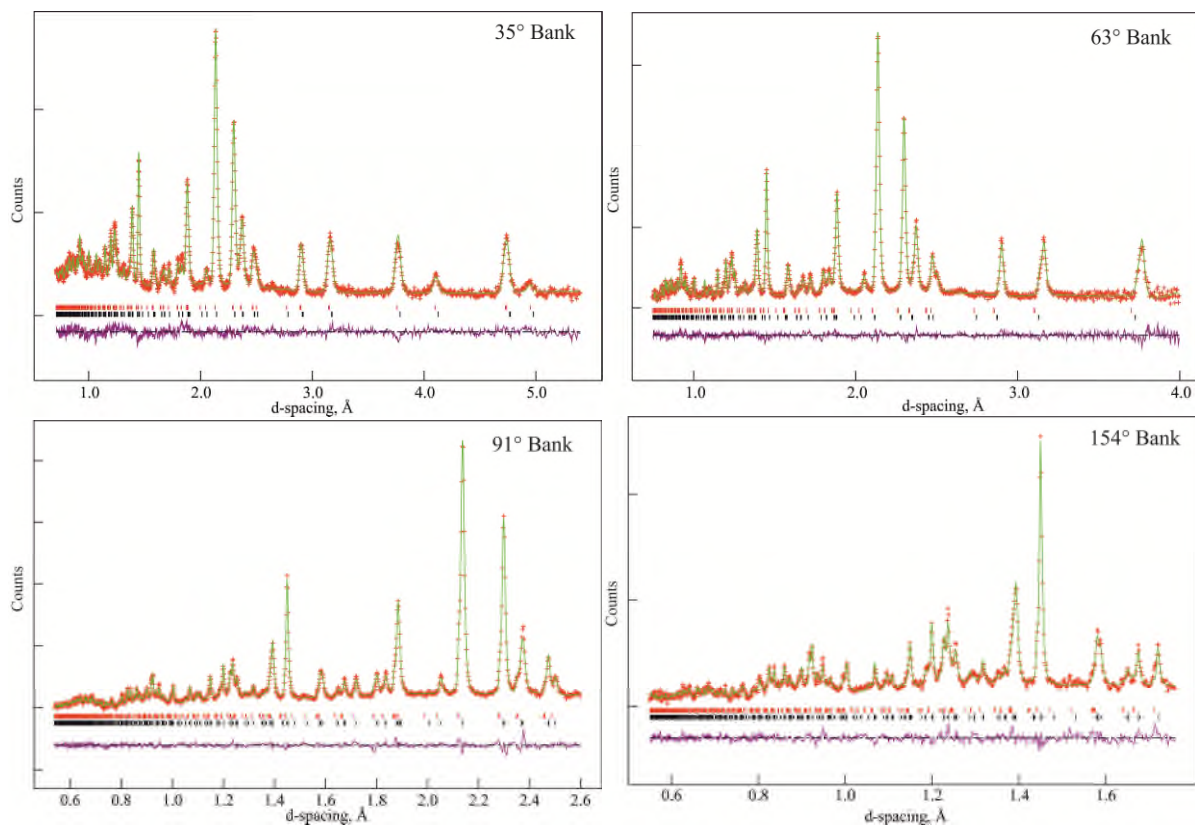

Figure S4: Observed, calculated and difference plots from the structural refinement of  $\text{Ba}_3\text{LaLiNb}_3\text{O}_{12}$  against neutron powder diffraction data. Lower tick marks indicate peak positions for the majority phase, upper tick marks for the secondary phase  $\text{Ba}_3\text{LaNb}_3\text{O}_{12}$ .

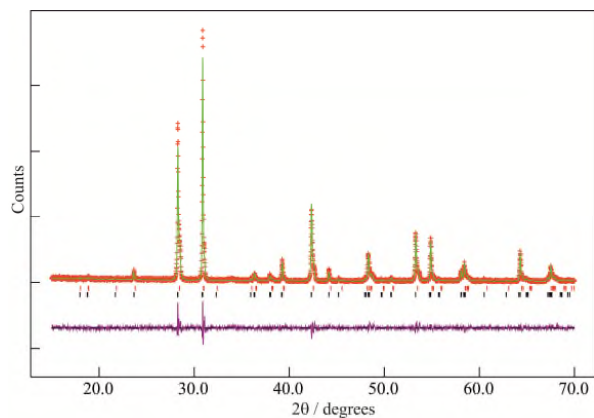

Figure S5: Observed, calculated and difference plots from the structural refinement of  $\text{Ba}_3\text{LaLiNb}_3\text{O}_{12}$  against X-ray powder diffraction data.
